# Supplementary material
Source: MDPI journal article supplement (https://www.mdpi.com/2411-9660/8/3/41)
Supplement: s1 [file s1]

# Supplementary Materials: Simplified Design Method for the Mechanical Stability of Slit-Shaped Additive Manufacturing Reactor Modules

David F. Metzger <sup>1,\*</sup> , Christoph Klahn <sup>2</sup>  and Roland Dittmeyer <sup>1</sup> 

**Table S1.** Composition of metal powders in wt-%. Both powders conformed both ASTM A276 and DIN EN 10088.

| Component | CT 316LF Batch PR100334 | POWDERRANGE SLM Solutions 316L Batch 2022000726 |
|-----------|-------------------------|-------------------------------------------------|
| C         | 0.02                    | 0.011                                           |
| Cr        | 17.8                    | 16.901                                          |
| Fe        | Bal.                    | Bal.                                            |
| Mn        | 0.91                    | 1.127                                           |
| Mo        | 2.34                    | 2.322                                           |
| Ni        | 12.6                    | 11.413                                          |
| N         | 0.06                    | 0.0987                                          |
| O         | 0.02                    | 0.0385                                          |
| P         | 0.012                   | 0.012                                           |
| Si        | 0.67                    | 0.718                                           |
| S         | 0.007                   | 0.02                                            |

**Table S2.** Modules without internal structures  $t_w=1\text{ mm}$ ,  $\varphi=0$ .

| Planar                                                                              | Corrugated<br>$n = 5$                                                               | Corrugated<br>$n = 10$                                                                | Corrugated per-<br>pendicular                                                         |
|-------------------------------------------------------------------------------------|-------------------------------------------------------------------------------------|---------------------------------------------------------------------------------------|---------------------------------------------------------------------------------------|
|   |   |    |   |
| Arched $\delta=5^\circ$                                                             | Arched $\delta=15^\circ$                                                            | Arched $\delta=30^\circ$                                                              | Arched $\delta=45^\circ$                                                              |
|  |  |  |  |

**Table S3.** Pin-equipped modules with  $t_w=0.6$  mm.

|                                                                                      |      |               |             |                  |
|--------------------------------------------------------------------------------------|------|---------------|-------------|------------------|
| $t_p$ / mm                                                                           | 2    | 0.42          | 0.26        | 0.6              |
| 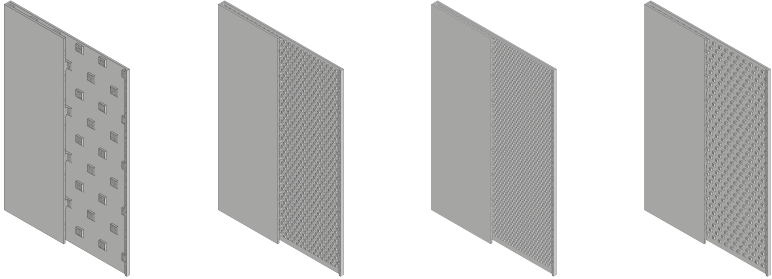   |      |               |             |                  |
| $\varphi$ / -                                                                        | 0.09 | 0.15          | 0.19        | 0.14             |
| $t_p$ / mm                                                                           | 1.0  | 0.42 regular. | 0.42 trans. | 3                |
|   |      |               |             |                  |
| $\varphi$ / -                                                                        | 0.12 | 0.13          | 0.15        | 0.12             |
| $t_p$ / mm                                                                           | 4    | 5             | 0.42        | 0.42             |
|  |      |               |             |                  |
| $\varphi$ / -                                                                        | 0.11 | 0.11          | 0.07        | 0.04             |
| $t_p$ / mm                                                                           | 0.42 | 0.42          | 0.42        | 0.42, $t_w=1$ mm |
|  |      |               |             |                  |
| $\varphi$ / -                                                                        | 0.02 | 0.017         | 0.01        | 0.15             |

**Table S4.** Fin-equipped modules.

|                                                                                     |      |      |      |
|-------------------------------------------------------------------------------------|------|------|------|
| $t_w$ / mm                                                                          | 1.0  | 0.6  | 1.0  |
| $t_e$ / mm                                                                          | 1    | 1    | 2    |
| 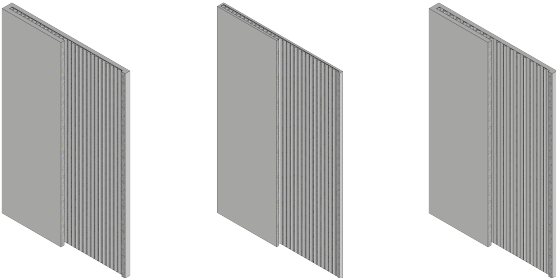  |      |      |      |
| $\varphi$ / -                                                                       | 0.33 | 0.33 | 0.14 |
| $t_e$ / mm                                                                          | 2    | 4    | 4    |
| $t_w$ / mm                                                                          | 0.6  |      |      |
|  |      |      |      |
| $\varphi$ / -                                                                       | 0.14 | 0.10 |      |

**Table S5.** FGE-equipped modules  $t_w=0.8$  mm.

|                                                                                      |       |   |   |   |
|--------------------------------------------------------------------------------------|-------|---|---|---|
| $d_{FGE}$ / mm                                                                       | 1.333 | 2 | 3 | 4 |
| 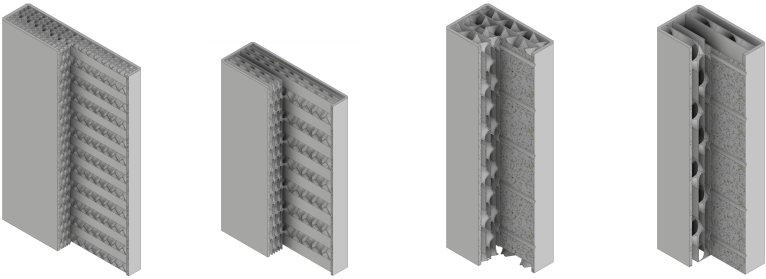 |       |   |   |   |
| $\varphi$ / -                                                                        |       |   |   |   |

**Table S6.** Lattice-equipped module.

|                                                                                      |      |
|--------------------------------------------------------------------------------------|------|
|                                                                                      | 6201 |
| $t_w$ / mm                                                                           | 0.6  |
| $t_e$ / mm                                                                           | 1    |
| 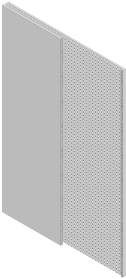 |      |
| $\varphi$ / -                                                                        | 0.20 |

**I: Statisch-mechanische Analyse**  
 Directional Deformation  
 Type: Directional Deformation(Y Axis)  
 Unit: mm  
 Global Coordinate System  
 Time: 1  
 07.03.2024 12:36

**0 Max**  
 -1,1193e-6  
 -2,2386e-6  
 -3,358e-6  
 -4,4773e-6  
 -5,5966e-6  
 -6,7159e-6  
 -7,8352e-6  
 -8,9546e-6  
**-1,0074e-5 Min**

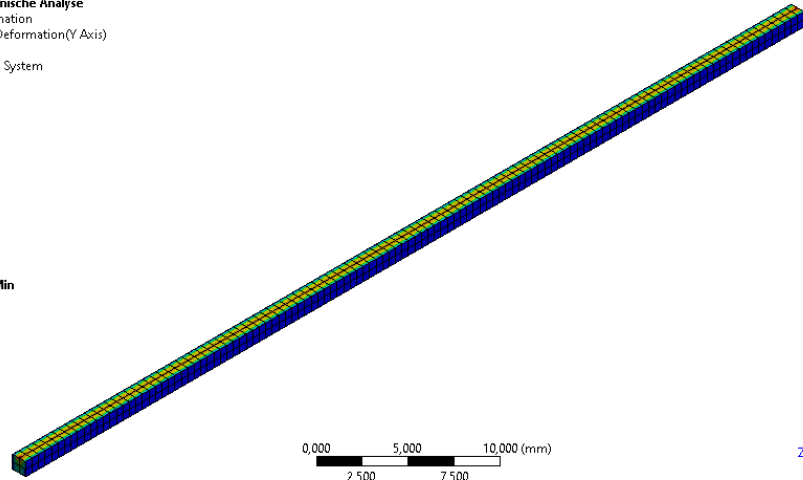

(a)  $w=1$  mm.

**J: 06\_RectD4\_01**  
 Directional Deformation  
 Type: Directional Deformation(Y Axis)  
 Unit: mm  
 Global Coordinate System  
 Time: 1  
 07.03.2024 13:04

**0 Max**  
 -2,4453e-5  
 -4,8906e-5  
 -7,3358e-5  
 -9,7811e-5  
 -0,00012226  
 -0,00014672  
 -0,00017117  
 -0,00019562  
**-0,00022008 Min**

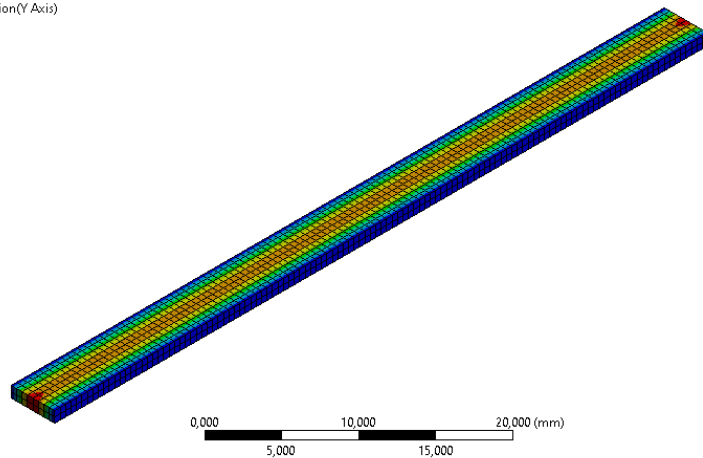

(b)  $w=4$  mm.

**K: 07\_RectW40\_01**  
 Directional Deformation  
 Type: Directional Deformation(Y Axis)  
 Unit: mm  
 Global Coordinate System  
 Time: 1  
 07.03.2024 13:05

**0,0008195 Max**  
 -0,13675  
 -0,27432  
 -0,41189  
 -0,54946  
 -0,68703  
 -0,8246  
 -0,96217  
 -1,0997  
**-1,2373 Min**

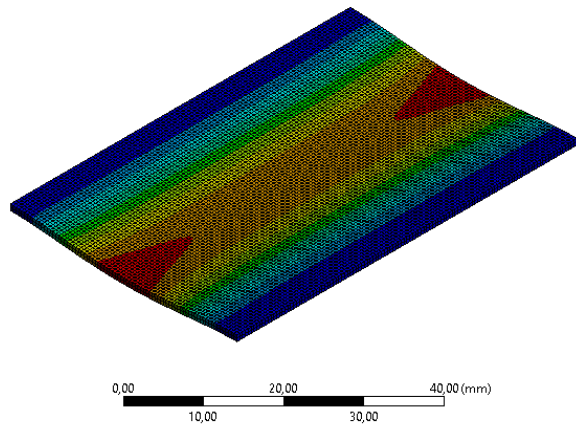

(c)  $w=40$  mm.

**Figure S1.** FEA results of empty and fin-equipped modules  $t_w=1$  mm,  $l=60$  mm.

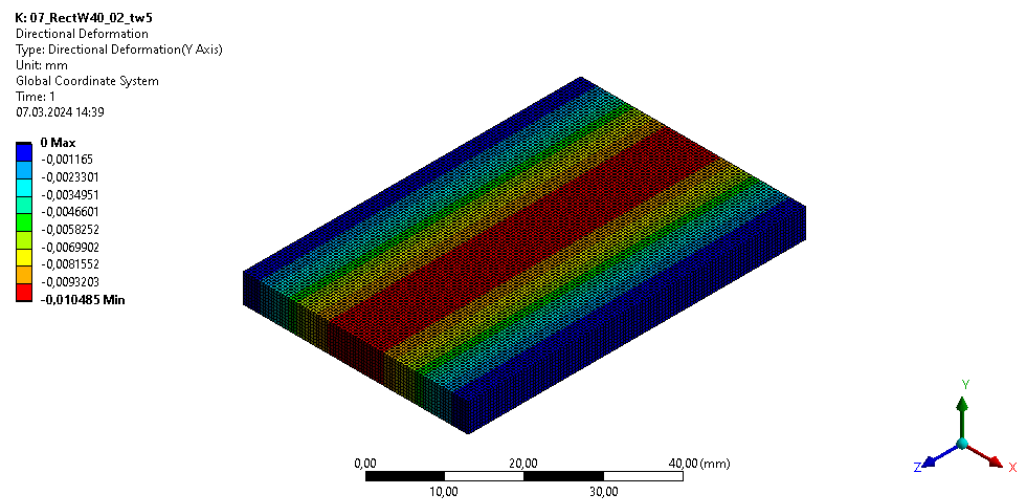

(d)  $w=40$  mm,  $t_w=5$  mm.

**Figure S1.** FEA results of empty and fin-equipped modules  $t_w=1$  mm,  $l=60$  mm. (cont.)

**B: 01\_BendEdge\_01**

Verschiebungskomponente  
Type: Directional Deformation(Y Axis)  
Unit: mm  
Globales Koordinatensystem  
Time: 1  
07.03.2024 11:23

0,00076456 Max  
-0,037886  
-0,076537  
-0,11519  
-0,15384  
-0,19249  
-0,23114  
-0,26979  
-0,30844  
-0,34709 Min

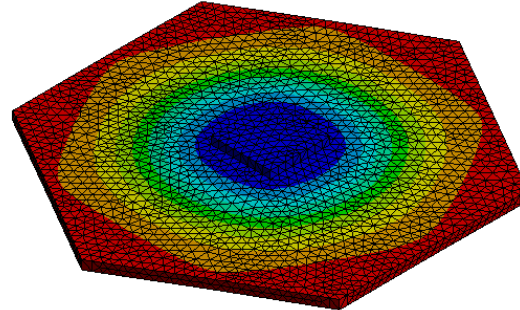

0,000 5,000 10,000 (mm)  
2,500 7,500

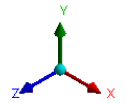

(a)  $t_p=4$  mm,  $a=20$  mm.

**C: Statisch-mechanische Analyse**

Directional Deformation  
Type: Directional Deformation(Y Axis)  
Unit: mm  
Global Coordinate System  
Time: 1  
07.03.2024 11:36

0,00071592 Max  
-0,037369  
-0,075454  
-0,11354  
-0,15162  
-0,18971  
-0,2278  
-0,26588  
-0,30397  
-0,34205 Min

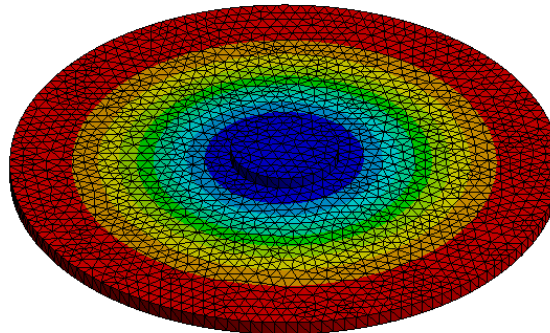

0,000 5,000 10,000 (mm)  
2,500 7,500

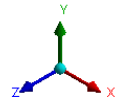

(b)  $d_i=4.514$  mm,  $d_o=21$  mm.

**D: 03\_Rupture\_01**

Directional Deformation  
Type: Directional Deformation(Y Axis)  
Unit: mm  
Global Coordinate System  
Time: 1  
07.03.2024 13:03

0 Max  
-0,00033269  
-0,00066538  
-0,00099807  
-0,0013308  
-0,0016634  
-0,0019961  
-0,0023288  
-0,0026615  
-0,0029942 Min

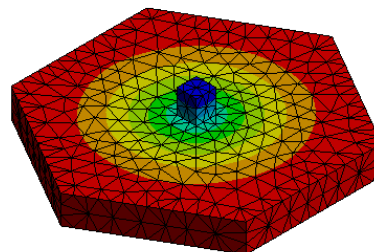

0,000 2,500 5,000 (mm)  
1,250 3,750

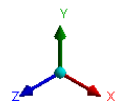

(c)  $p=0.42$  mm,  $a=5$  mm,  $\varphi=0.0081$ .

Figure S2. FEA results of pin-equipped modules  $t_w=0.6$  mm.



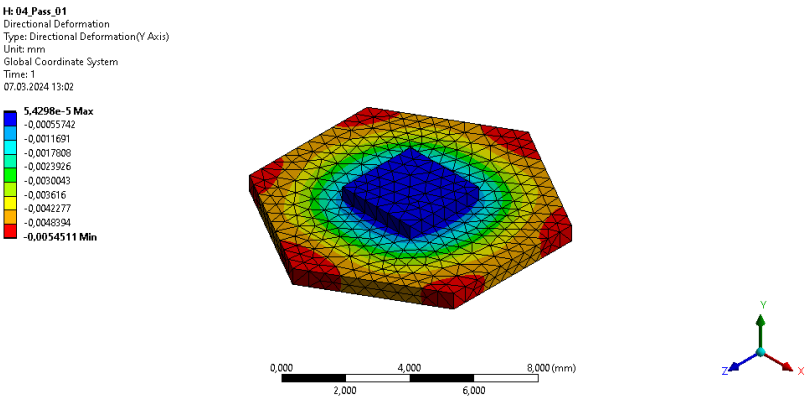

(d)  $p=3\text{ mm}$ ,  $a=9\text{ mm}$ .  
Figure S2. FEA results of pin-equipped modules. (cont.)

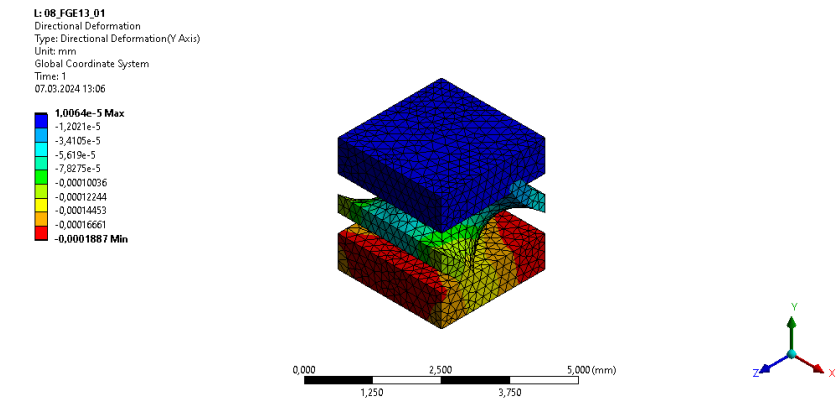

(a)  $d_{FGE}=1.333$  mm.

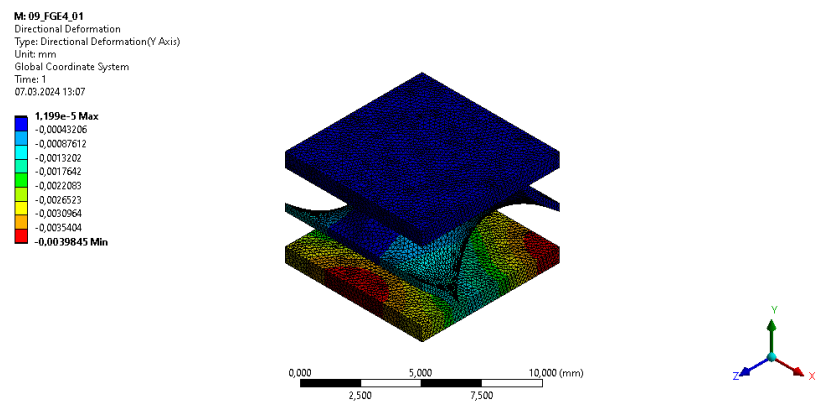

(b)  $d_{FGE}=4$  mm.

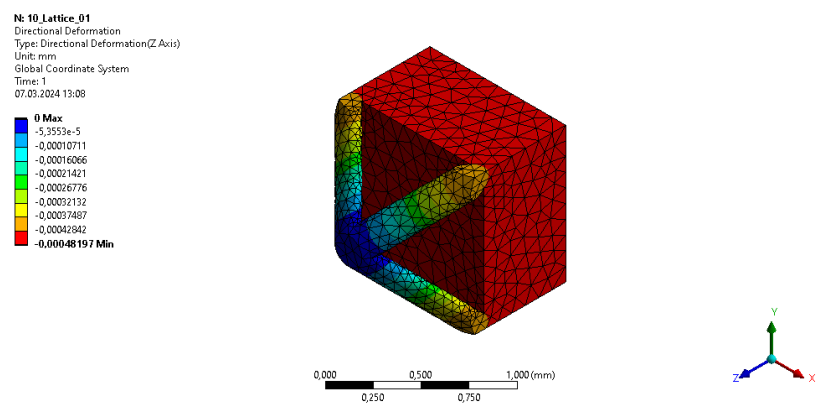

(c)  $d_{strut}=0.2$  mm.

**Figure S3.** FEA results of FGE-equipped ( $t_w=0.8$  mm,  $t_{FGE}=0.4$  mm) and lattice-equipped ( $t_w=0.6$  mm) modules.

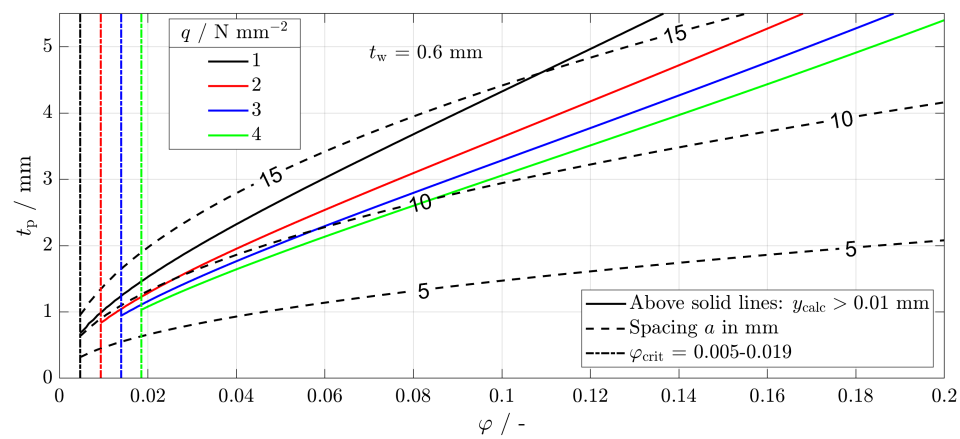

**Figure S4.** Calculated stability criterion for various loads at constant thickness.

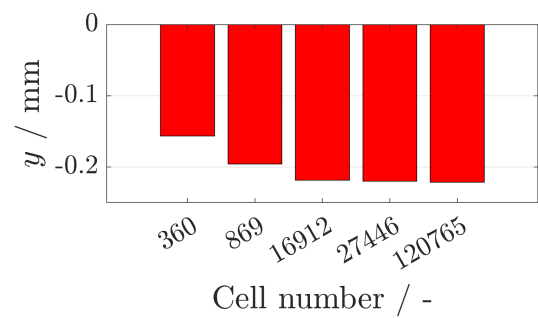

**Figure S5.** Results of mesh independence study with element size from  $t = 2, 1, 0.5, 0.2$ , to  $0.1$  mm.

**Author Contributions:** Conceptualization, D.F.M., C.K. and R.D.; methodology, D.F.M.; software, D.F.M.; validation, D.F.M.; formal analysis, D.F.M.; investigation, D.F.M.; resources, C.K. and R.D.; data curation, D.F.M.; writing—original draft preparation, D.F.M.; writing—review and editing, D.F.M., C.K. and R.D.; visualization, D.F.M. and C.K.; supervision, C.K. and R.D.; project administration, C.K. and R.D.; funding acquisition, R.D. All authors have read and agreed to the published version of the manuscript

**Funding:** We are grateful to the German Federal Ministry of Education and Research (BMBF) for funding the work through the project Kopernikus P2X-Phase 2 (Funding ID: 03SFK2K0-2).

**Data Availability Statement:** Data can be made available upon request.

**Acknowledgments:** We sincerely thank: the KIT-Publication Fund of the Karlsruhe Institute of Technology for its support, the funding bodies of the Large Scale Data Facility (<https://www.scc.kit.edu/forschung/11843.php>, accessed on 5 March 2024).

**Conflicts of Interest:** The authors declare no conflicts of interest.

## Abbreviations

The following abbreviations are used in this manuscript:

| Symbol               | Meaning                          | Unit       |
|----------------------|----------------------------------|------------|
| <i>Latin Symbols</i> |                                  |            |
| $d_{\text{FGE}}$     | Depth of fluid guiding element   | mm         |
| $d_{\text{strut}}$   | Diameter of strut                | mm         |
| $t$                  | Dimension                        | mm         |
| $t_{\text{w}}$       | Wall thickness                   | mm         |
| <i>Greek Symbols</i> |                                  |            |
| $\delta$             | Angle of inclination of parabola | $^{\circ}$ |
| $\phi$               | Volume fraction                  |            |
| <i>Indices</i>       |                                  |            |
| $e$                  | Empty                            |            |
| $l$                  | Lattice                          |            |
| $p$                  | Pins                             |            |

**Disclaimer/Publisher's Note:** The statements, opinions and data contained in all publications are solely those of the individual author(s) and contributor(s) and not of MDPI and/or the editor(s). MDPI and/or the editor(s) disclaim responsibility for any injury to people or property resulting from any ideas, methods, instructions or products referred to in the content.
