# Supplementary material
Source: MDPI journal article supplement (https://www.mdpi.com/2411-9660/8/3/41)
Supplement: s1 [file s1]

Archive with 1 entries (1 files):
- designs-2975640-supplementary.pdf
